# Supplementary material for: G0/G1 Switch Gene 2 controls adipose triglyceride lipase activity and lipid metabolism in skeletal muscle
Source: PubMed Central journal article supplement — Mol Metab. 2016 Apr 22;5(7):527–37. doi: 10.1016/j.molmet.2016.04.004 (PMC4921782; doi:10.1016/j.molmet.2016.04.004), 2016-04-22
Supplement: mmc1.pdf [file mmc1.pdf]

**Figure S1.** Validation of G0S2 knockdown in skeletal muscle *in vivo*. (A) G0S2 mRNA and (B) protein levels in control (shNT) and G0S2 knockdown (shG0S2) mouse *tibialis anterior* (n=4-7). (C) ATGL mRNA and (D) protein levels in control (shNT) and G0S2 knockdown (shG0S2) mouse *tibialis anterior* (n=7). \*p<0.05, \*\* p<0.01 versus shNT.

**Figure S2.** Effect of high fat feeding on skeletal muscle G0S2 protein expression *in vivo*. (A) body weight, (B) insulin-stimulated glucose uptake and (C) G0S2 protein content in *tibialis anterior* muscle of mice fed normal chow diet (NCD) or high fat diet 60% fat (HFD) for 12 weeks (n=7). \*p<0.05, \*\*\* p<0.001 versus NCD.

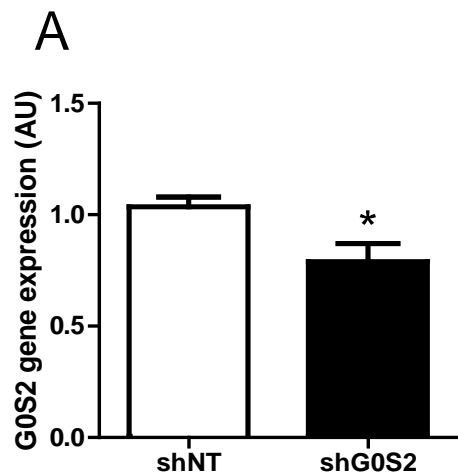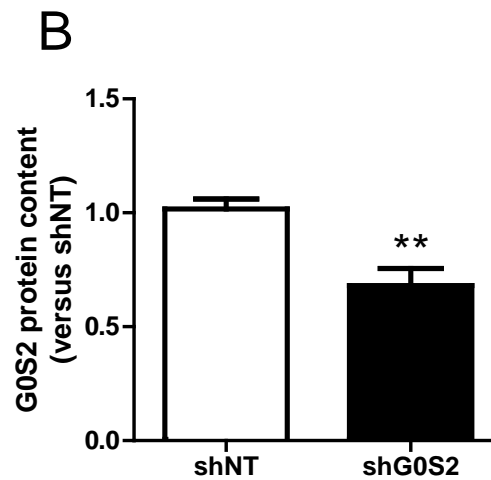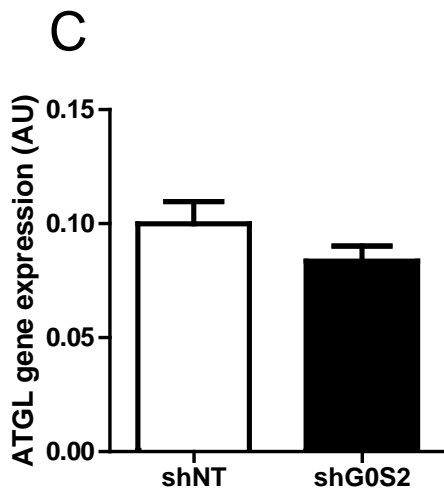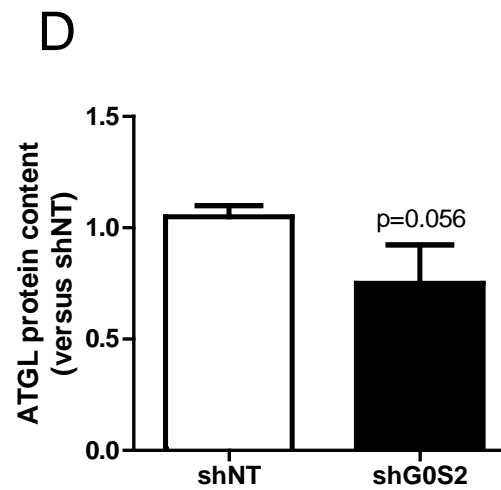

Figure S1

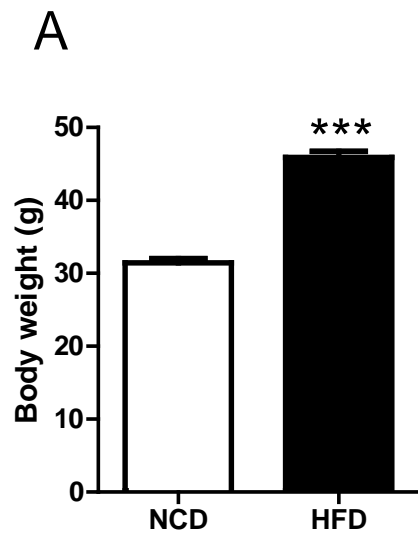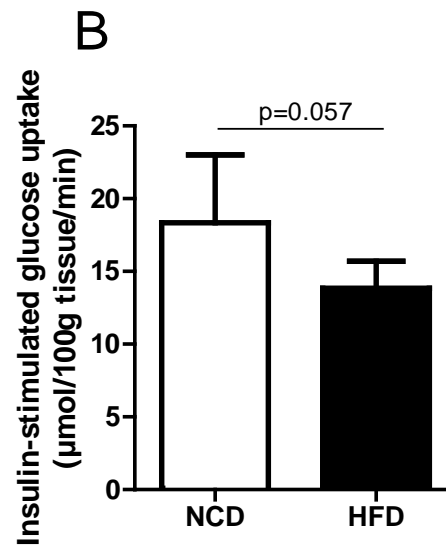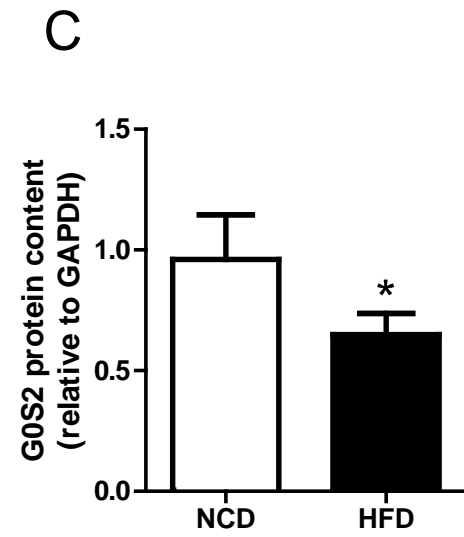

Figure S2
